# Supplementary material
Source: Springer Nature journal article supplement (https://www.springermedizin.de/resource/supplementary/13058_2008_2151_MOESM2_ESM.pdf/9700754)
Supplement: MOESM2 [file 9700754]

**A**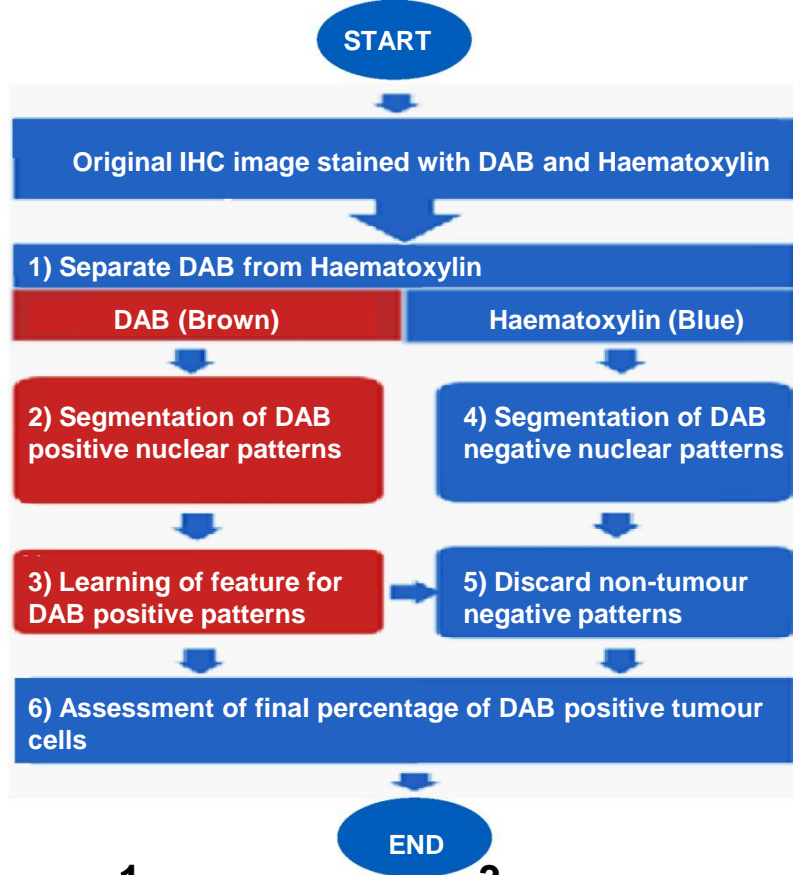**B**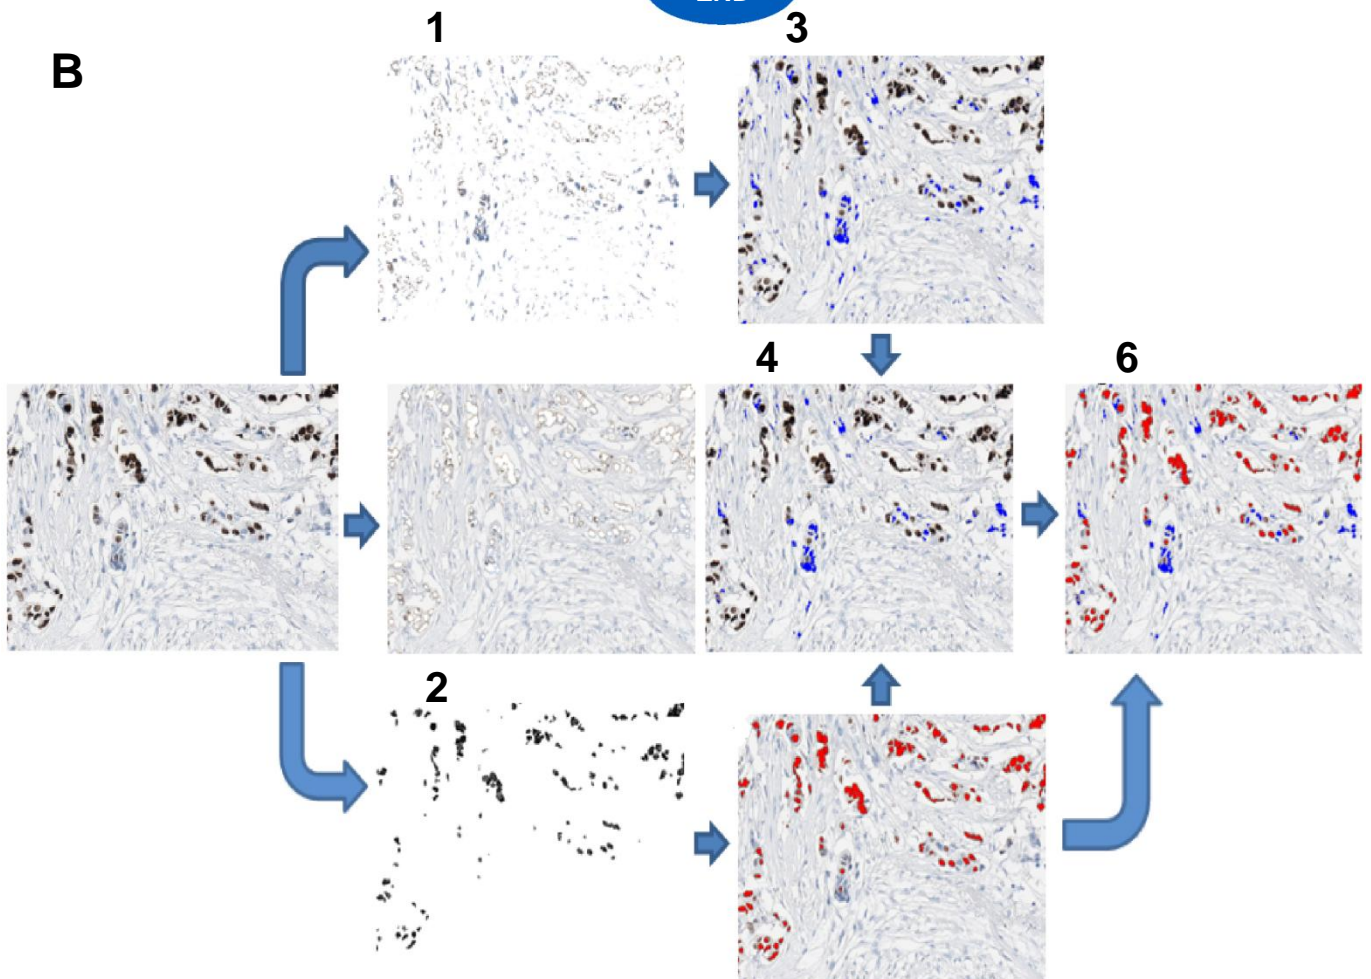

Figure 1

## 1) Separation of DAB from Haematoxylin

Representative DAB negative and positive tumour patterns are selected and converted into LUV colour space

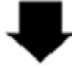

Mean L levels for each pattern are computed based on the images selected above

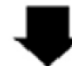

Based on the thresholds defined above DAB is separated from Haematoxylin

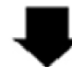

Tissue is separated from slide background using a set of RGB thresholds optimised for IHC and the Aperio scanner

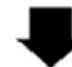

RGB values of Haematoxylin positive pixels are converted in the HSV colour space to separate connective tissue from nuclear negative staining

## 2) Segmentation of all nuclear patterns

Convert image from RGB to CIE LUV uniform colour space and then convert the L channel to gray level

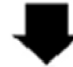

Adjust contrast of the gray level representation above

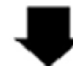

Apply mean shift segmentation to separate nuclear staining from background cytoplasmic staining

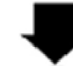

Extract gray level values of pixels isolated above

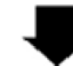

Adjust contrast of the gray level representation above

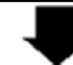

Apply watershed segmentation to identify all nuclei

Figure 2

# Extraction of DAB positive nuclei and their morphological and spatial properties

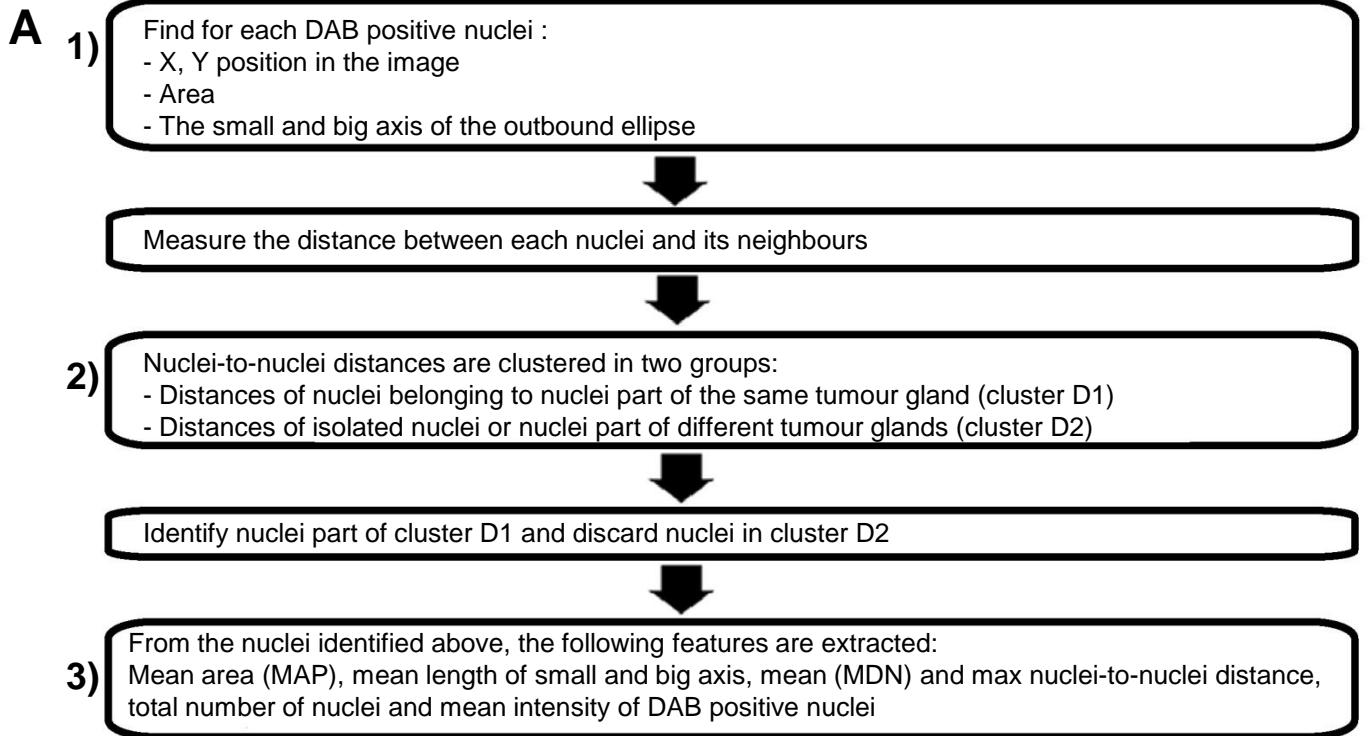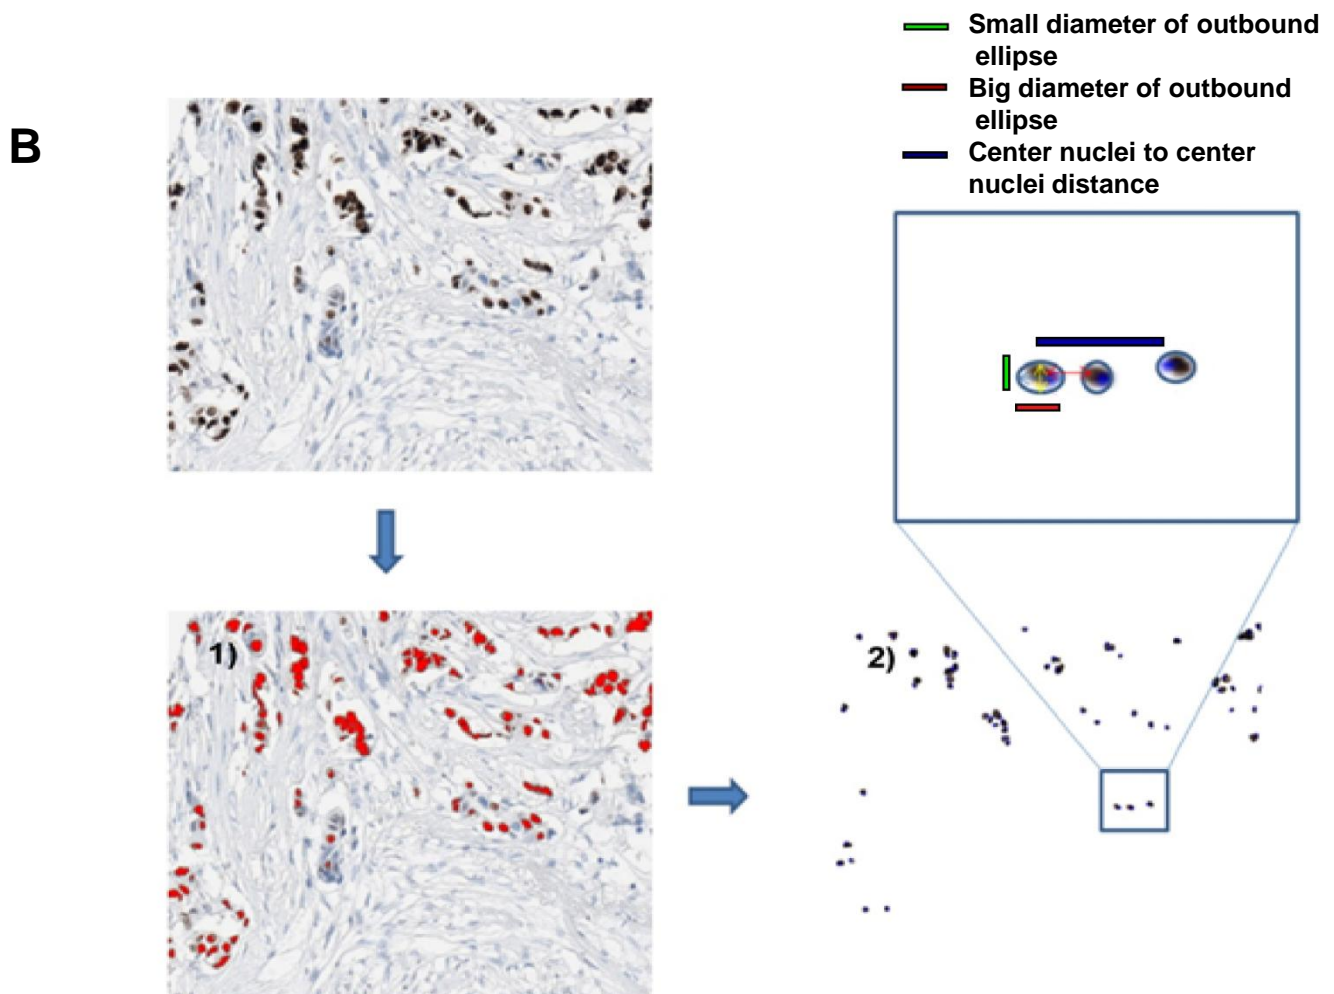

Figure 3

# Extraction of DAB tumor negative nuclei

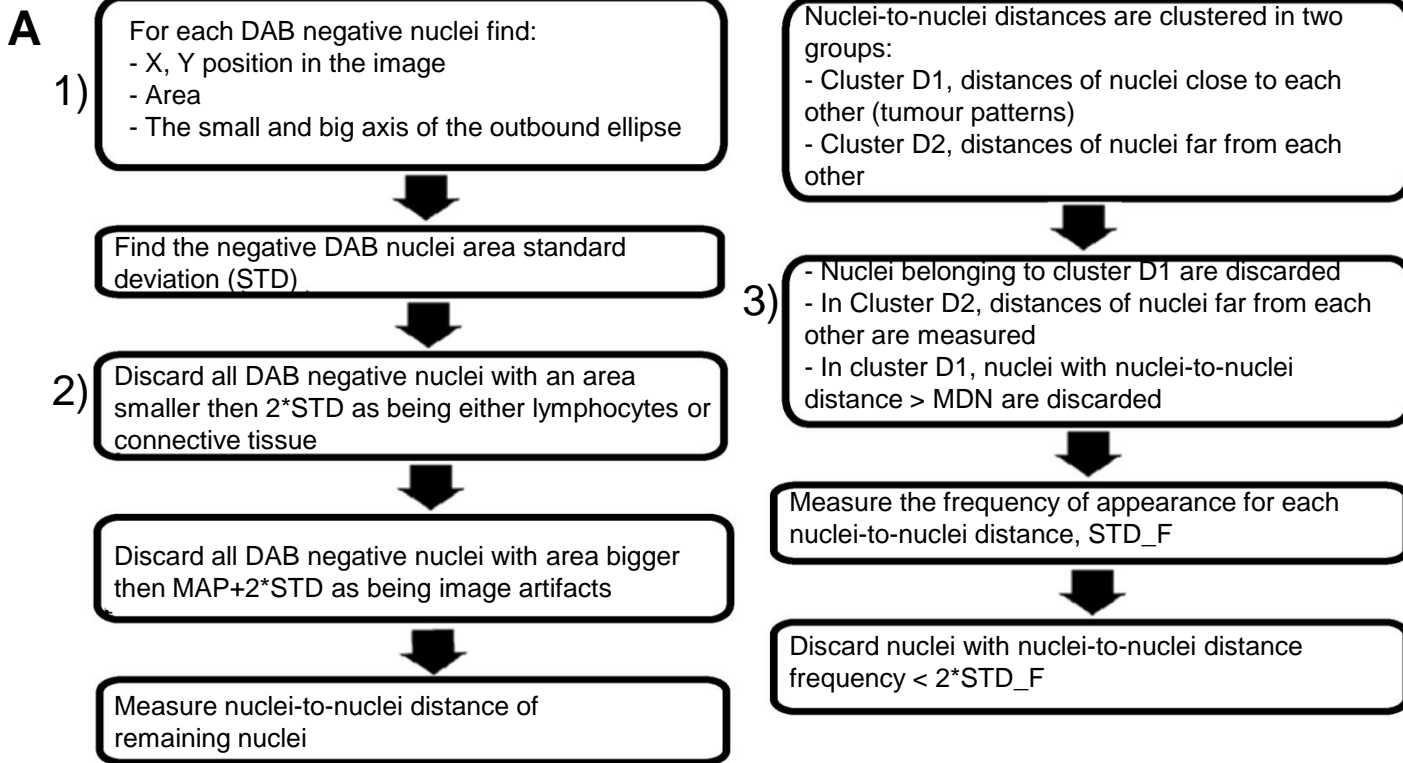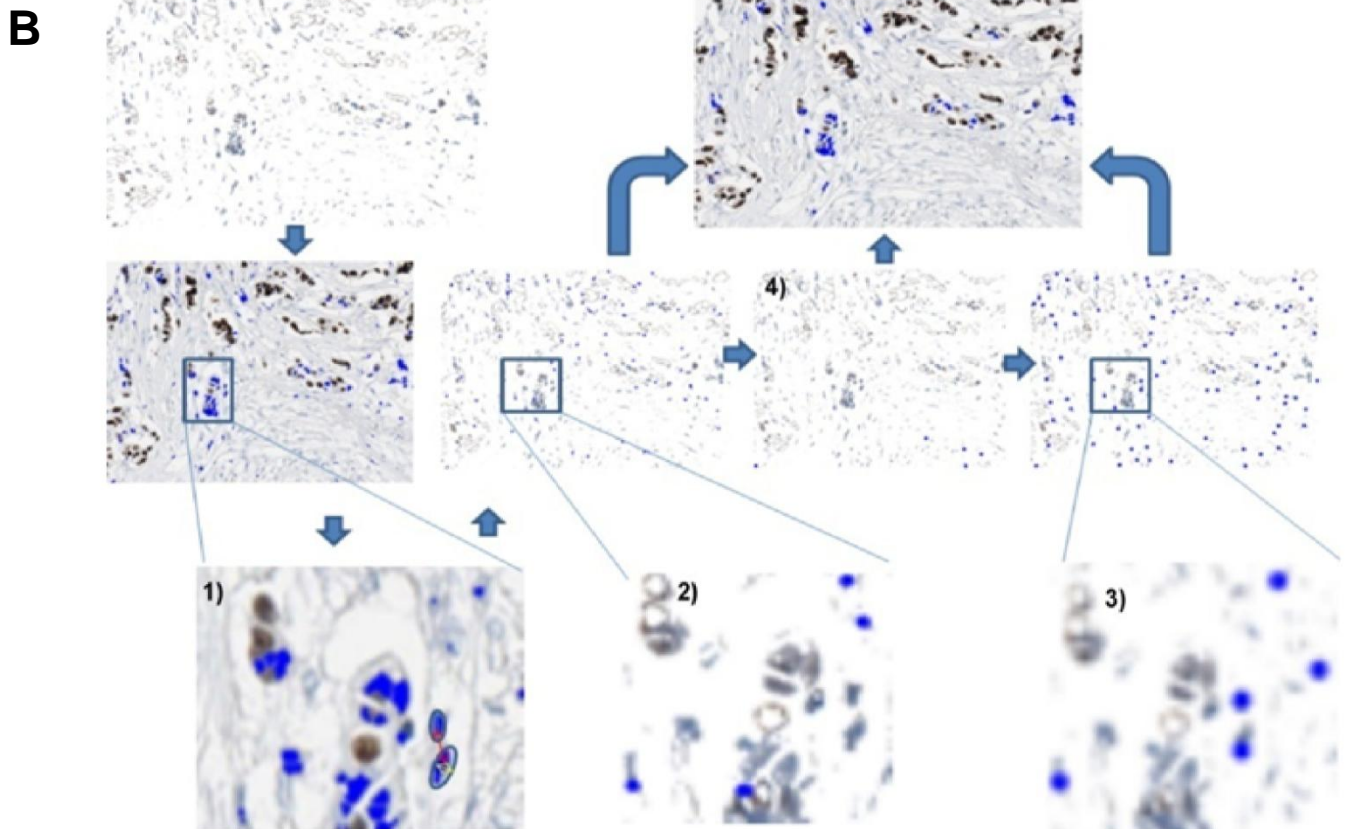

Figure 4
